# Supplementary material for: Chick embryo xenograft model reveals a novel perineural niche for human adipose-derived stromal cells
Source: PubMed Central journal article supplement (PMC4582113; doi:10.1242/bio.010256), 2015-08-28
Supplement: supp_bio.010256_BIO010256supp.pdf [file supp_bio.010256_BIO010256supp.pdf]

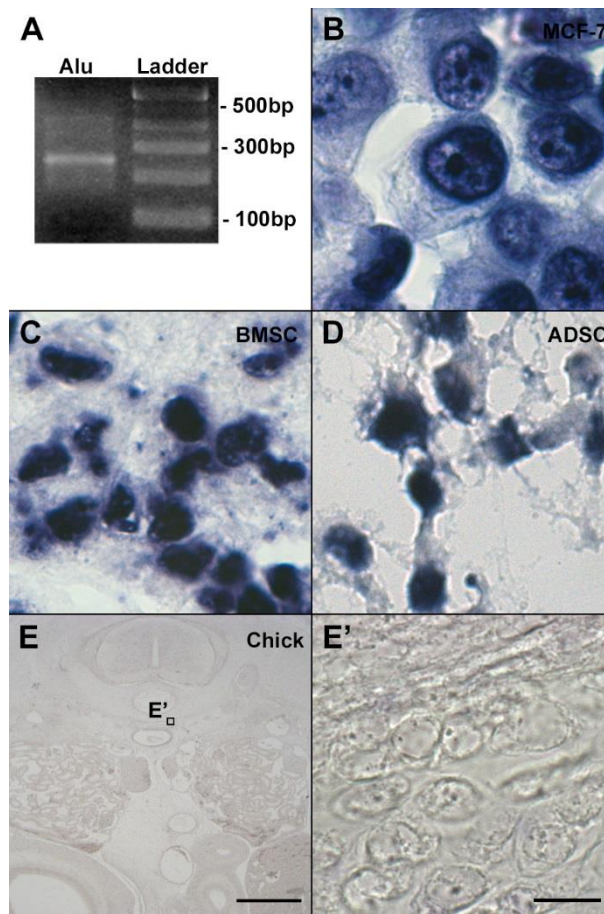

**Fig. S1. In situ hybridization with *Alu* probes.** (A) *Alu* DNA probes were synthesized through PCR using digoxigenin-11-dUTP nucleotides. As expected, probes had between 200 and 300 bp. (B,C,D) In situ hybridization revealed that *Alu* probes stained only the nuclei of different human samples, illustrated by the tumoral cell line MCF-7 (B), bone marrow-derived stromal cells (C) and adipose-derived stromal cells (D). (E,E') Chick embryos were used as a negative control. No nuclei were found stained. (B,C,D,E') Scale: 10 $\mu$ m. (E) Scale: 500 $\mu$ m.

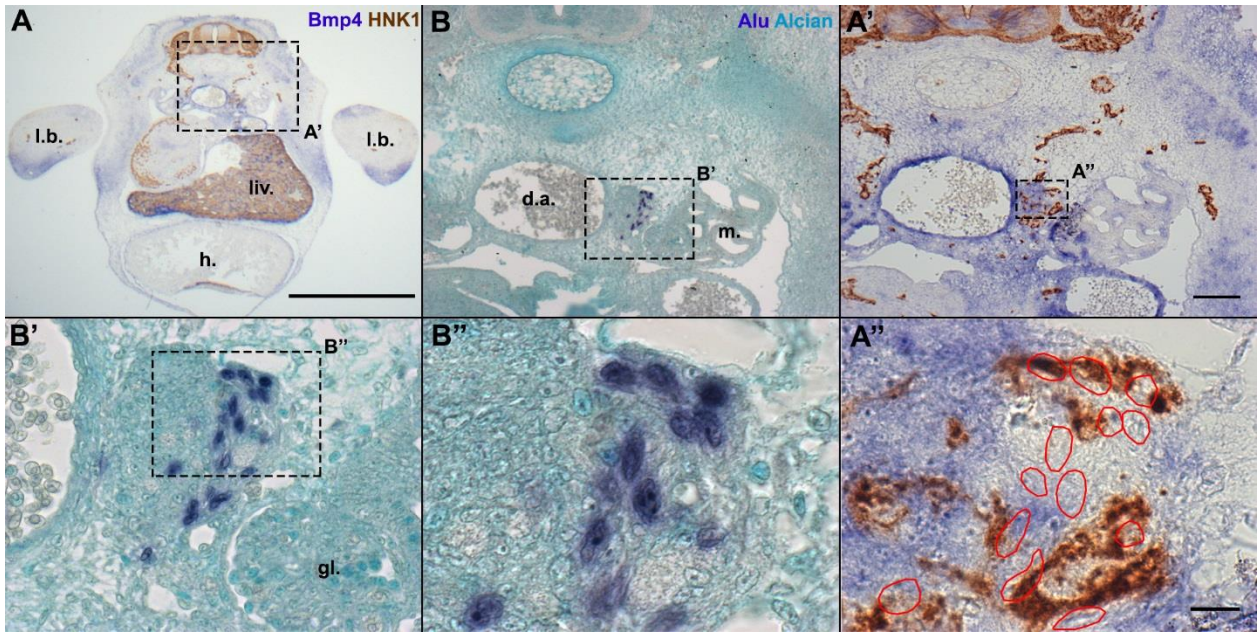

**Fig. S2. Some hADSC were observed in the adrenal primordium.** (A, A',A'') In situ hybridization with *Bmp4* RNA probes and immunostaining with HNK1 antibody. Scale: 1mm. (B,B',B'') In situ hybridization with *Alu* probes revealed hADSC in close proximity to the adrenal primordium in one embryo. Counterstaining with Alcian blue. (A'') *Alu*+ nuclei in an adjacent section are indicated with a red outline. hADSC were localized closer to the HNK1+ sympathoadrenal progenitors than to the *Bmp4*+ adrenal cortical cells. (A',B) Scale: 100µm. (A'',B'') Scale: 10µm. D.a., dorsal aorta; gl., glomerulus; h., heart; l.b., limb bud; liv., liver; m., mesonephros.

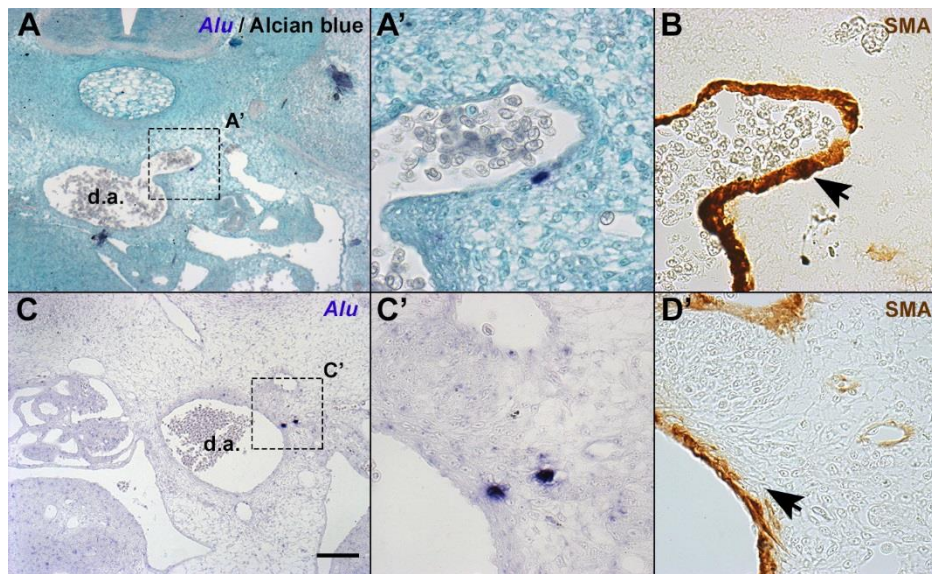

**Fig. S3 Perivascular hADSC could be positive or negative for  $\alpha$ -Smooth Muscle Actin (SMA).** In situ hybridization with *Alu* probes (blue) reveal human cells (black arrows) associated with the dorsal aorta (d.a.). Immunostaining with SMA (brown). (**A, A', B**) Human cell in a SMA+ perivascular region. (**C, C', D**) Human cell in na adventitial position, in a SMA- region. Scale: 100 $\mu$ m. (A',B,C',D) Scale: 20 $\mu$ m.

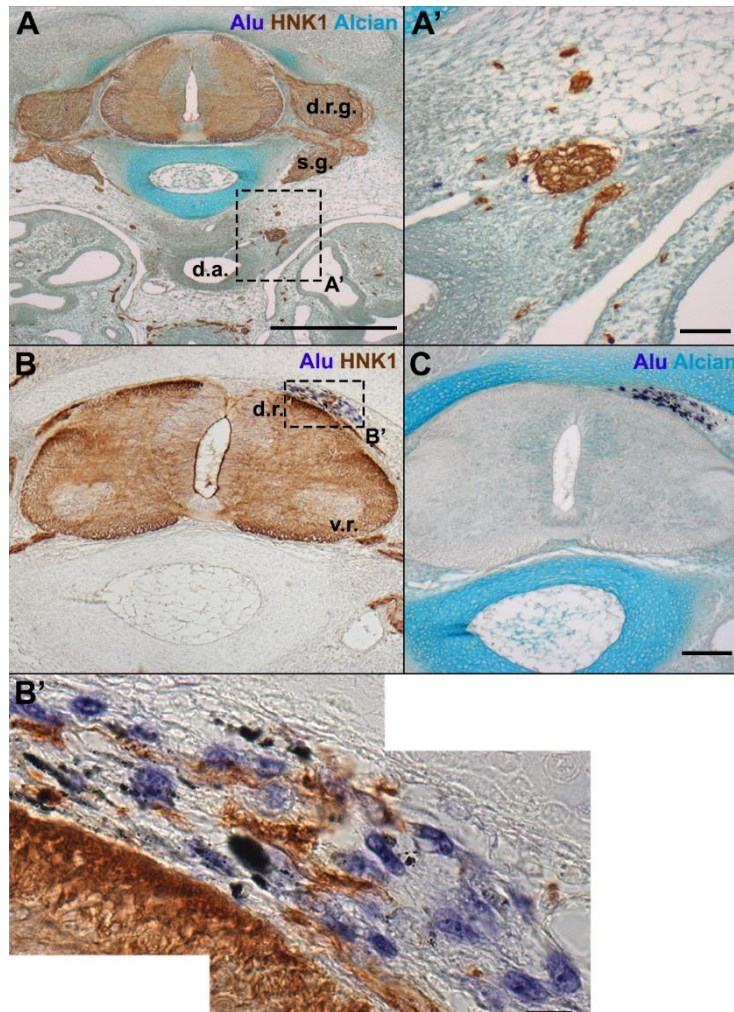

**Fig. S4. Distribution of hADSC cells in E8 chick embryos.** (A,A') In situ hybridization with *Alu* probes, immunostaining with HNK1 and cartilage staining with Alcian blue in cross-sections. In one embryo, ASC were localized dorsolateral to the dorsal aorta, close to a HNK1+, ganglion-like structure. (A) Scale: 500µm. (B,B') In another embryo, in situ hybridization with *Alu* probes and immunostaining with HNK1 antibody showed ASC in the region of the dorsal root. (B') is composed of two partially overlapping micrographs. Scale: 10µm. (C) In a serial section to (B), in situ hybridization with *Alu* probes and Alcian blue staining revealed that ASC were not inside the vertebra condensation. (B,C) Scale: 100µm. D.a., dorsal aorta; d.r., dorsal root; d.r.g., dorsal root ganglion; s.g., sympathetic ganglion; v.r., ventral root.

**Table S1. Distribution of human skin fibroblasts cells in E6 chick embryos.** The first column represents individual embryos and the respective grafting sites. The other columns represent the number of cells counted in a given location. Cells were manually counted in 7µm sections with intervals of 28µm. Proximity to HNK1+ tissues was identified visually. Sum of *Alu*+ nuclei in a given location, and their percentages relative to total cell count in the embryo, are given in the last row. PSM, presomitic mesoderm.

|                         |                  |                         | Mesenchyme lateral to neural tube and notochord |                   | Mesenchyme ventral to the notochord |                  |                                |                   |                             |                           |
|-------------------------|------------------|-------------------------|-------------------------------------------------|-------------------|-------------------------------------|------------------|--------------------------------|-------------------|-----------------------------|---------------------------|
|                         | Dorsal dermis    | Adjacent to neural tube | Close to HNK1                                   | Not close to HNK1 | Perivascular                        | Close to HNK1    | Perivascular and close to HNK1 | Neither           | Dorsal aorta (Perivascular) | <b>Total (per embryo)</b> |
| Embryo 1 (15°-16° PSM)  | 3                | 5                       | 0                                               | 1                 | 12                                  | 6                | 4                              | 18                | 0                           | <b>49</b>                 |
| Embryo 2 (18°-19° PSM)  | 5                | 18                      | 48                                              | 20                | 8                                   | 4                | 2                              | 7                 | 6                           | <b>118</b>                |
| Embryo 3 (18° PSM)      | 3                | 0                       | 0                                               | 3                 | 0                                   | 12               | 1                              | 39                | 2                           | <b>60</b>                 |
| Embryo 4 (18° PSM)      | 1                | 0                       | 0                                               | 1                 | 0                                   | 0                | 3                              | 3                 | 0                           | <b>8</b>                  |
| <b>Total (per site)</b> | <b>12 (5,1%)</b> | <b>23 (9,8%)</b>        | <b>48 (20,4%)</b>                               | <b>25 (10,6%)</b> | <b>20 (8,5%)</b>                    | <b>22 (9,4%)</b> | <b>10 (4,3%)</b>               | <b>67 (28,5%)</b> | <b>8 (3,4%)</b>             | <b>235</b>                |
